## ASA Showcases PSH Model of Care in Communications Efforts

Stanley W. Stead, M.D., M.B.A., Chair  
PSH Steering Committee  
ASA Vice President for Professional Affairs

As physician anesthesiologists advance the Perioperative Surgical Home (PSH) model and more data are available to support how the concept helps provide better outcomes, lower costs and improved patient satisfaction, ASA is showcasing the innovative model in its communications efforts. The PSH has been highlighted in the last year in media outreach, member communications and digital marketing.

To help explain the model, a series of bylined articles and media coverage were secured in trade media targeting hospital administrators and executives, including Modern Healthcare, Health Affairs, Health & Hospital Networks, KevinMD.com, Minnesota Physician, Becker's ASC Review, Infection Control Today and MedCity News.

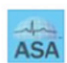

The American Society of Anesthesiologists (ASA)  
Sponsored -

You have the best doctors, administrators, care team and technology — but do you have 100% surgical patient satisfaction? We do. The Perioperative Surgical Home decreases surgery delays, reduces pain scores and lowers readmission rates. Learn more.

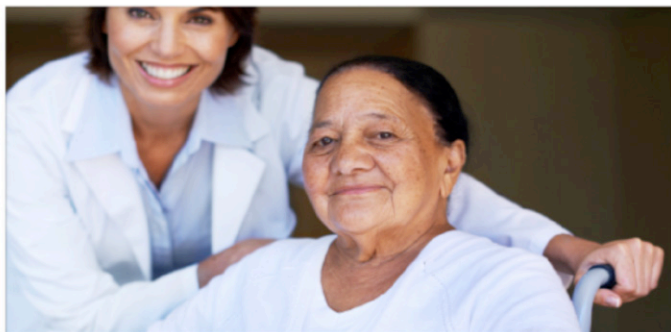

### From Preoperative to Postoperative Care: Smiles and Satisfaction

From preoperative to postoperative care, we can improve patient outcomes and satisfaction. Register now for our Annual Perioperative

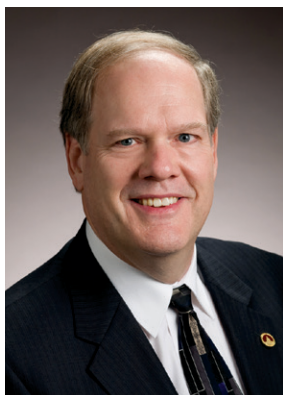

Stanley W. Stead, M.D., M.B.A., is  
Professor of Anesthesia and Perioperative  
Care, University of California, Irvine.

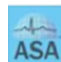

The American Society of Anesthesiologists (ASA)  
Sponsored -

Streamline your operating room: Adopting the Perioperative Surgical Home saved this hospital \$1.7 million. Register for the Annual Perioperative Surgical Home Summit to learn more.

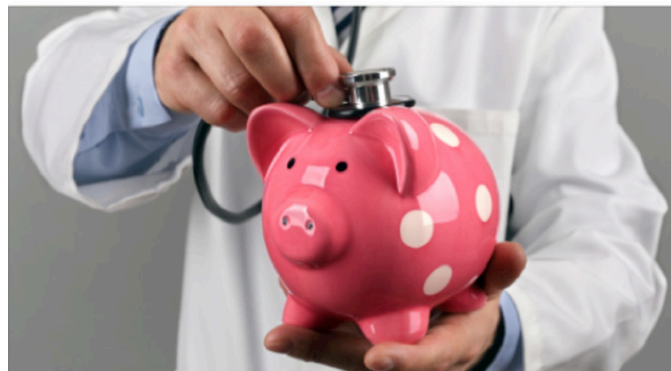

### Healthy Patients — and a Healthy Bottom Line

Don't miss our Annual Perioperative Surgical Home Summit, June 26–28.

ASAHQ.ORG/WHENSECONDS COUNT/PSH

Learn More

Some of the coverage highlighted the launch of ASA's Learning Collaborative, which has 44 health care organizations from across the country working together as a network who can pilot projects and learn from each other and from recognized experts. The long-term goal is to create an evidence-based "road map" for health care organizations to spread knowledge and best practices of the PSH model. ASA's media outreach efforts were complemented by the Learning Collaborative participants who also reached out to media to announce their participation.

Media coverage often features preliminary findings from successful PSH models, including news from Kaiser Permanente on how knee replacement patients go home sooner, are highly satisfied and incur less cost when a physician anesthesiologist coordinates care. The research was presented at the ANESTHESIOLOGY™ 2014 annual meeting.

In addition to PSH research news, the annual meeting also provided an opportunity to present the PSH model to ASA members as a "disruptive innovation" poised to reshape the specialty and the entire health care surgical system during the Opening Session, "Are You the Anesthesiologist of the Future?"

A video during the session on PSH followed speaker Jason Hwang, M.D., and highlighted how disruptive innovations in anesthesiology, from the discovery of ether in 1856 to epidural

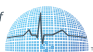

anesthesia and rapid-acting agents, have advanced the practice of medicine. Physician anesthesiologists Arthur Boudreaux, M.D., Professor of Anesthesiology and Chief of Staff, UAB Medicine; Zeev Kain, M.D., Chancellor's Professor and Chair of the Department of Anesthesiology and Perioperative Care and Associate Dean for Clinical Operations, UC Irvine Health; Peter Dunbar, M.D., ASA Committee on Future Models of Anesthesia Practice; Jane C.K. Fitch, M.D., ASA Immediate Past President; and Mike Schweitzer, M.D., Chair, ASA Committee on Future Models of Anesthesia Practice, each shared how the specialty is poised to take the next step in spearheading efforts to improve patient care through the PSH.

Communications activities were expanded this year to online media with a digital marketing campaign to promote the PSH model and the PSH Surgical Summit in June. A series of ads were placed on Facebook and LinkedIn to target health care executives and surgeon specialists. The ads included information on how the PSH could lead to better outcomes and cost savings and drove readers to a special webpage summarizing the model and available data showing reduced hospital stays, improved pain scores and patient satisfaction, and cost savings. The ads reached almost 3.1 million people and generated 6,465 site visits and 139,806 views of an abbreviated version of the video shown at the ANESTHESIOLOGY™ 2014 annual meeting.

#### The American Society of Anesthesiologists (ASA) Sponsored •

The Perioperative Surgical Home has physicians and care teams driving the best standards of surgical care. PSH decreases surgery delays, reduces pain scores and lowers readmission rates.

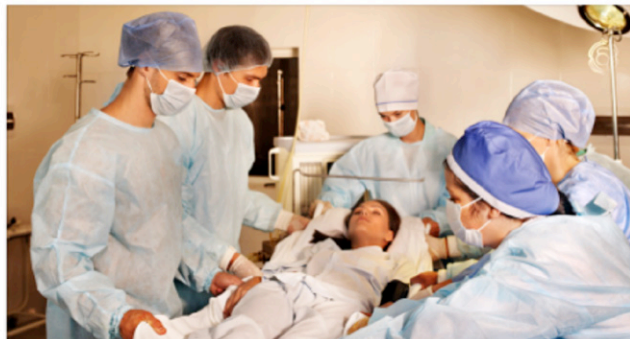

#### Build a Better Surgical Home for Better Outcomes

From preoperative to postoperative care, we can improve patient outcomes and satisfaction. Register now for our Annual Perioperative Surgical Home Summit, June 26–28.

While the concept may not be as familiar as the “medical home,” it is gaining traction and ASA has plans to begin introducing the concept to general consumer media in an effort to increase public awareness so that one day the public can request that a physician anesthesiologist help coordinate all their care through this model of the future.

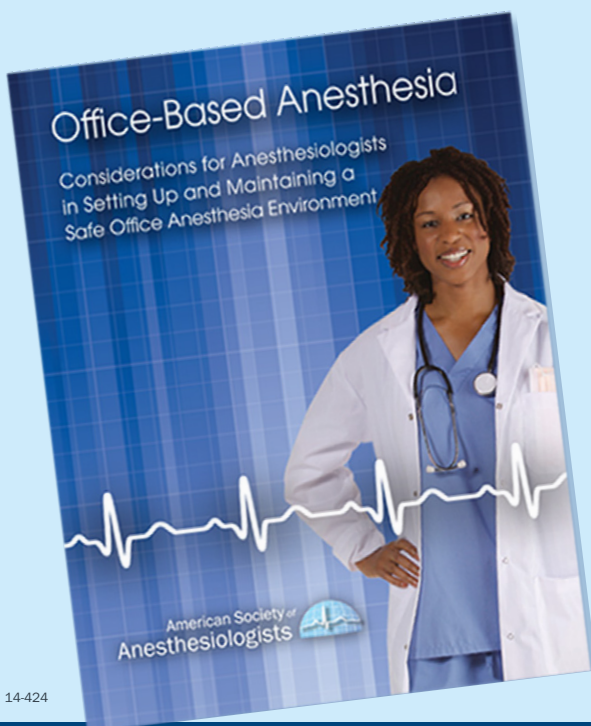

14-424

American Society of  
Anesthesiologists® 

## Discover the latest Office-Based Anesthesia guidelines

Deliver quality care and improve patient safety by learning how to set up a safe anesthesia practice.

Get answers to commonly asked questions such as:

- What is different (or not different) about preparing, monitoring and recovering patients for office anesthesia?
- What are the unique practice management issues that should be addressed?
- What are the options for accreditation?
- What is unique in office professional liability coverage?

**Order now**  
[asahq.org/oba](http://asahq.org/oba)
